# Supplementary material for: SorLA regulates the activity of lipoprotein lipase by intracellular trafficking
Source: Oxford University Press journal article supplement (doi:10.1242/jcs.072538), 2011-03-09
Supplement: jcs072538tables1.pdf [file jcs072538tables1.pdf]

**Table S1. Primer sequences for quantitative real-time PCR**

| Primer name                  | Primer sequence (5'–3') |
|------------------------------|-------------------------|
| LPL-Forward                  | CCGGTTTATCAACTGGATGG    |
| LPL-Reverse                  | TGGTCAGACTTCCTGCAATG    |
| SORL1-Forward<br>(for SorLA) | GCGACTTCCGACTCACAATC    |
| SORL1-Reverse<br>(for SorLA) | AGGCAGCAGAACCATCCATA    |
| HPRT1-Forward                | TGACACTGGCAAAACAATGCA   |
| HPRT1-Reverse                | GGTCCTTTTCACCAGCAAGCT   |
